# Supplementary material
Source: Springer Nature journal article supplement (https://www.springermedizin.de/resource/supplementary/12903_2013_466_MOESM1_ESM.pdf/9516748)

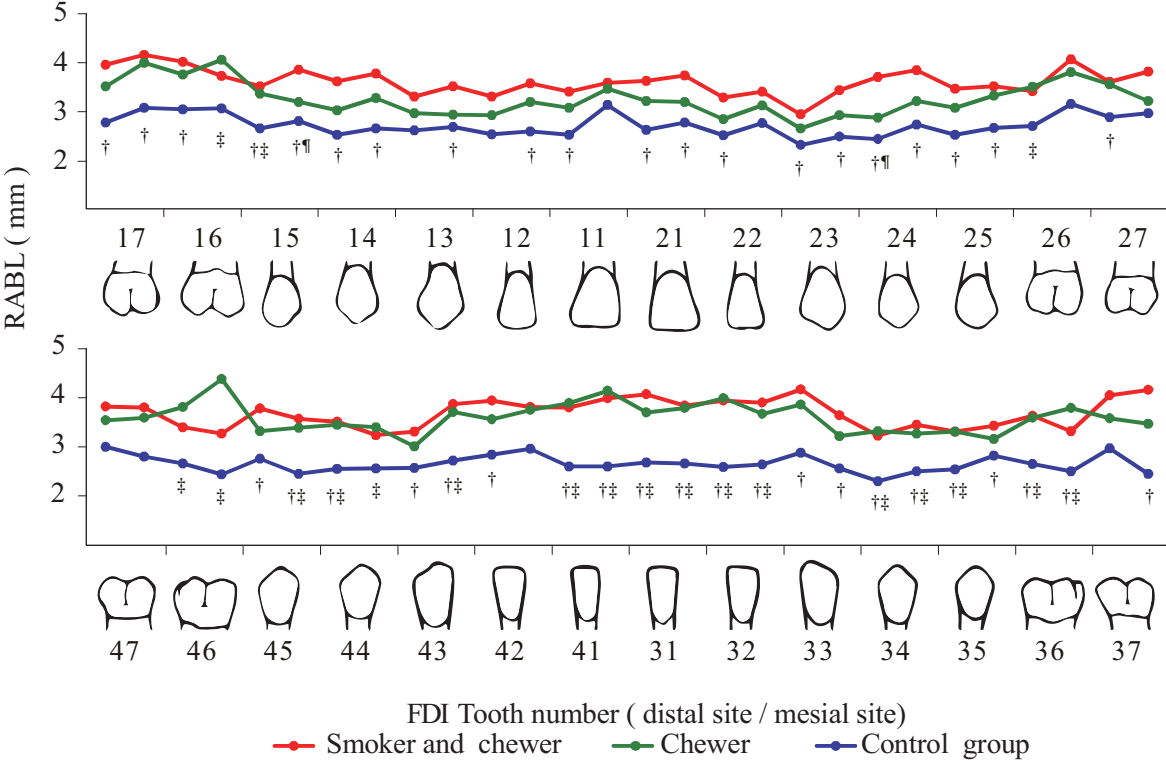

Supplement: MOESM1 [file 9516748]
